# Supplementary material for: CYB5R3 functions as a tumor suppressor by inducing ER stress-mediated apoptosis in lung cancer cells via the PERK-ATF4 and IRE1α-JNK pathways
Source: PubMed Central journal article supplement (PMC10834511; doi:10.1038/s12276-024-01155-9), 2024-01-22
Supplement: 12276_2024_1155_MOESM1_ESM.pdf [file 12276_2024_1155_MOESM1_ESM.pdf]

## **Supplementary information**

### **MATERIAL AND METHODS**

#### **Materials**

MitoTracker (M7512), MitoSOX Red (M36008) and NOX4 siRNA (HSS121312) were purchased from Thermo Scientific. (Rockford, IL, USA). Anti-NOX4 (ab109225) were obtained from Abcam (Cambridge, UK). Anti-Flag-M2 affinity agarose beads (A2220) were obtained from Sigma-Aldrich (St. Louis, MO, USA). Anti-CYB5R1 (sc-160051) or anti-CYB5R2 (sc-161509) were obtained from Santa Cruz Biotechnology (Dallas, TX, USA).

#### **Mitochondrial superoxide staining**

MitoSOX Red was used to measure mitochondrial superoxide according to the manufacturer's instructions. Briefly, H1299 cells infected with EV or CYB5R3 for 24 h were stained with MitoSOX Red (1  $\mu$ M) for 30 min and washed three times with HBSS. Images were acquired using CKX53 fluorescent microscope (Olympus, Tokyo, Japan).

#### **Cell culture**

The Lewis lung cancer (LLC) cells were purchased from ATCC (Manassas, VA, USA). LLC cells were cultured in Dulbecco's modified Eagle's medium (DMEM) supplemented with 10% fetal bovine serum (FBS), penicillin/streptomycin (Invitrogen, Carlsbad, CA, USA).

#### **Animal experiments**

All mouse experiments were conducted in accordance with a protocol approved by the Institutional Animal Care and Use Committee. C57BL/6 mice were purchased from the ORIENT BIO (Gyeonggi-do, Korea). For all tissues including brain, heart, lung, liver, stomach,

spleen, kidney, testis and ovary from control mice were placed in cryogenic vials and frozen immediately in liquid nitrogen. All tissues were stored at -80°C until the analysis.

For isolation of mouse lung fibroblast, C57BL/6 mice were sacrificed and the lungs were removed and digested, and the resulting lung cells were plated and cultured as described previously<sup>1</sup>.

For LLC metastasis mouse models, CYB5R3<sup>+/+</sup> or CYB5R3<sup>-/-</sup> mice were used at 7-9 weeks of age.  $5 \times 10^5$  LLC cells were inoculated into subcutaneous dorsal area in a volume of 100  $\mu$ l. The size of primary tumors was measured regularly every 3 days using calipers and calculated according to the formula  $[(\text{length} \times \text{width}^2) / 2]$ , where length represents the larger tumor diameter and width represents the smaller tumor diameter. Primary tumors were surgically removed when they reached approximately 500 mm<sup>3</sup> in tumor volume. Metastatic tumor formation in the lungs were sacrificed after 4 weeks. Mice were sacrificed every week after LLC cell injection and tumor tissues were harvested for further analyses. Lungs were fixed in 10% buffered formalin and embedded in paraffin. Histological sections (5  $\mu$ m) were stained with hematoxylin and eosin and analyzed in an Olympus microscope.

**Supplementary Fig. 1. Downregulation of CYB5R3 in human tumors.** **a** CYB5R3 expression profile across all tumor samples and corresponding normal tissues in the TCGA database. **b** Representative images and scores of IHC staining showing CYB5R3 expression in human lung cancer tissue array. IHC scores defined 0-3+ according to staining intensity. Scale bar, 100  $\mu$ m.

**Supplementary Fig. 2. Expression of CYB5R1 and CYB5R2 in human lung cancer.** **a** CYB5R1 expression level in normal lung tissue and lung cancer patients. **b** CYB5R2 expression level in normal lung tissue and lung cancer patients. The expression data was

collected in TCGA cohort cBioPortal (<http://cbioportal.org>) and then visualized by ggplot2 (version 3.3.6). All statistical analyses were performed using R software. **c** Protein levels of CYB5R1 or CYB5R2 in 2 human lung fibroblasts and 8 lung cancer cell lines.

**Supplementary Fig. 3. Validation of CYB5R3 knockout mouse models.** **a** The expression levels of CYB5R3 in mouse tissues. SE (short exposure), LE (long exposure). **b** Comparison of CYB5R3 expression between mouse normal lung fibroblast and LLC cells. **c** Schematic presentation of CYB5R3 KO mice generation. **d** Body weight in CYB5R3<sup>+/+</sup> or CYB5R3<sup>-/-</sup> mice (n=24 per group). **e** Immunoblot analysis of the indicated mouse tissues in CYB5R3<sup>+/+</sup>, CYB5R3<sup>+/-</sup> or CYB5R3<sup>-/-</sup> mice (n=3 per group). **f** Tumor burden metastasized to lung after injection of LLC into tail vein in CYB5R3<sup>+/+</sup> or CYB5R3<sup>-/-</sup> mice (n=3 per group). **g** H&E staining of lung tissues in CYB5R3<sup>+/+</sup> or CYB5R3<sup>-/-</sup> mice at the indicated times after injection of LLC into tail vein (n=3 per group). Scale bar, 100  $\mu$ m.

**Supplementary Fig. 4. Mitochondrial localization of CYB5R3.** Immunofluorescence staining of Flag (green) and Mito tracker (red) was carried out in H1299 cells infected with EV or CYB5R3 for 24 h. DAPI (blue) was used for nuclei staining. Scale bar, 10  $\mu$ m.

**Supplementary Fig. 5. CYB5R3 interacts with PERK and IRE1 $\alpha$ .** The immunoprecipitation was performed with anti-Flag-M2 affinity agarose in H1299 cells infected with EV or CYB5R3 for 24 h. Immunoprecipitates were performed by immunoblot analysis using the indicated antibodies.

**Supplementary Fig. 6. Mitochondrial superoxide levels in CYB5R3 overexpressed cells.** Mitochondrial superoxide was measured using MitoSOX Red in H1299 cells infected with EV

or CYB5R3 for 24 h. Scale bar, 50  $\mu\text{m}$ .

**Supplementary Fig. 7. NOX4 regulates CYB5R3-induced H<sub>2</sub>O<sub>2</sub> production.** **a** H<sub>2</sub>O<sub>2</sub> was measured using ROS-Glo H<sub>2</sub>O<sub>2</sub> assay in H1299 cells infected with EV or CYB5R3 for 24 h following transfection with siRNA against NOX4 (siNOX4) or scramble (siScr). n=5; \* indicates  $p < 0.05$  between indicated groups with two-way ANOVA with multiple comparison test. **b** H1299 cells were co-transfected CYB5R3 with siNOX4 or siScr. Protein level of NOX4 and CYB5R3 was measured by immunoblot analysis at 72 h after transfection.

## REFERENCE

1. Seluanov, A., Vaidya, A. & Gorbunova, V. Establishing primary adult fibroblast cultures from rodents. *J Vis Exp* (2010).

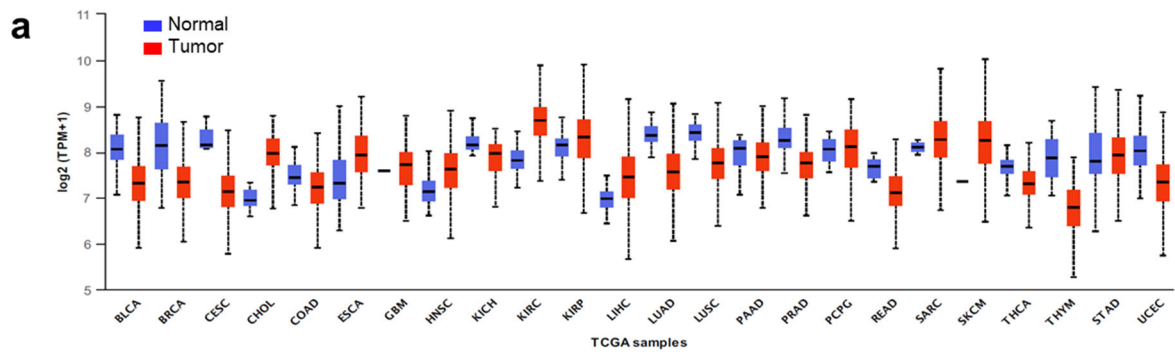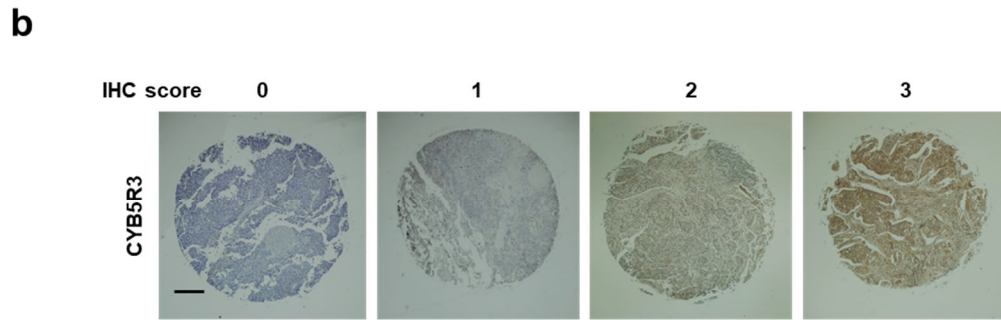

Supplementary Fig. 1

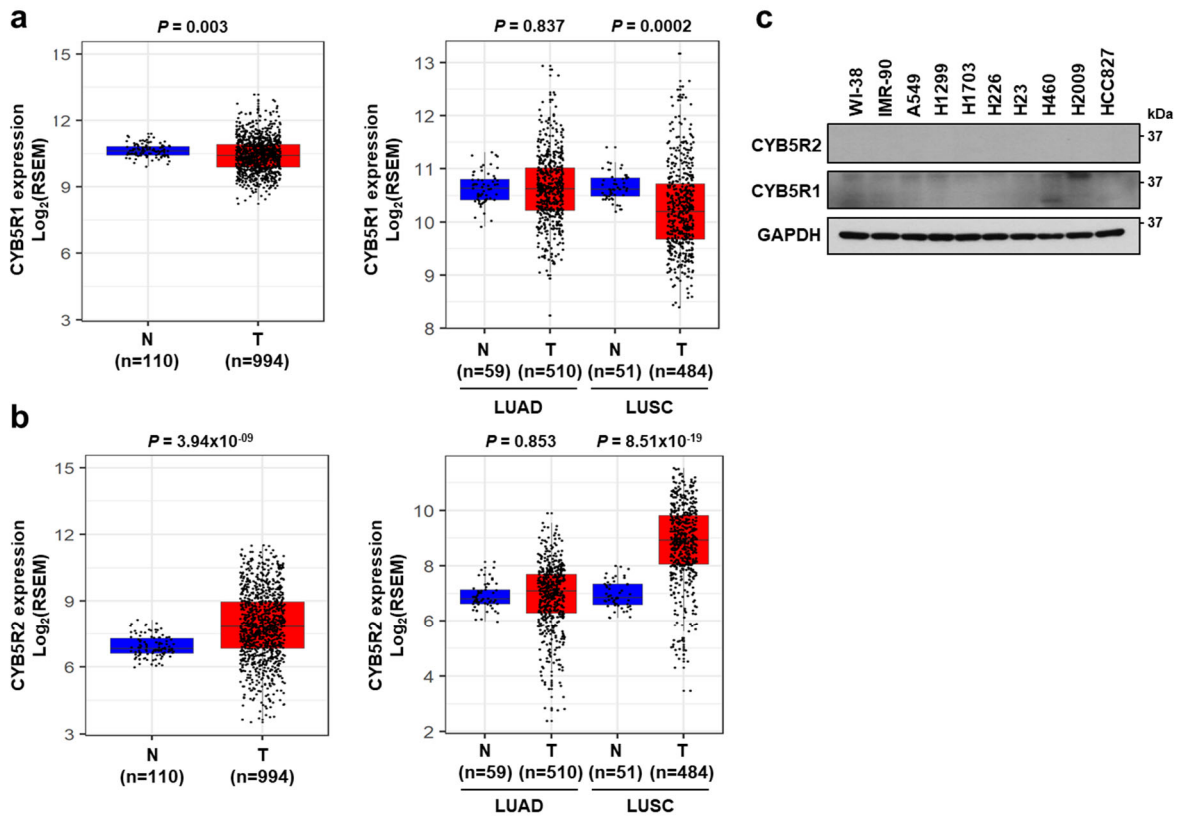

Supplementary Fig. 2

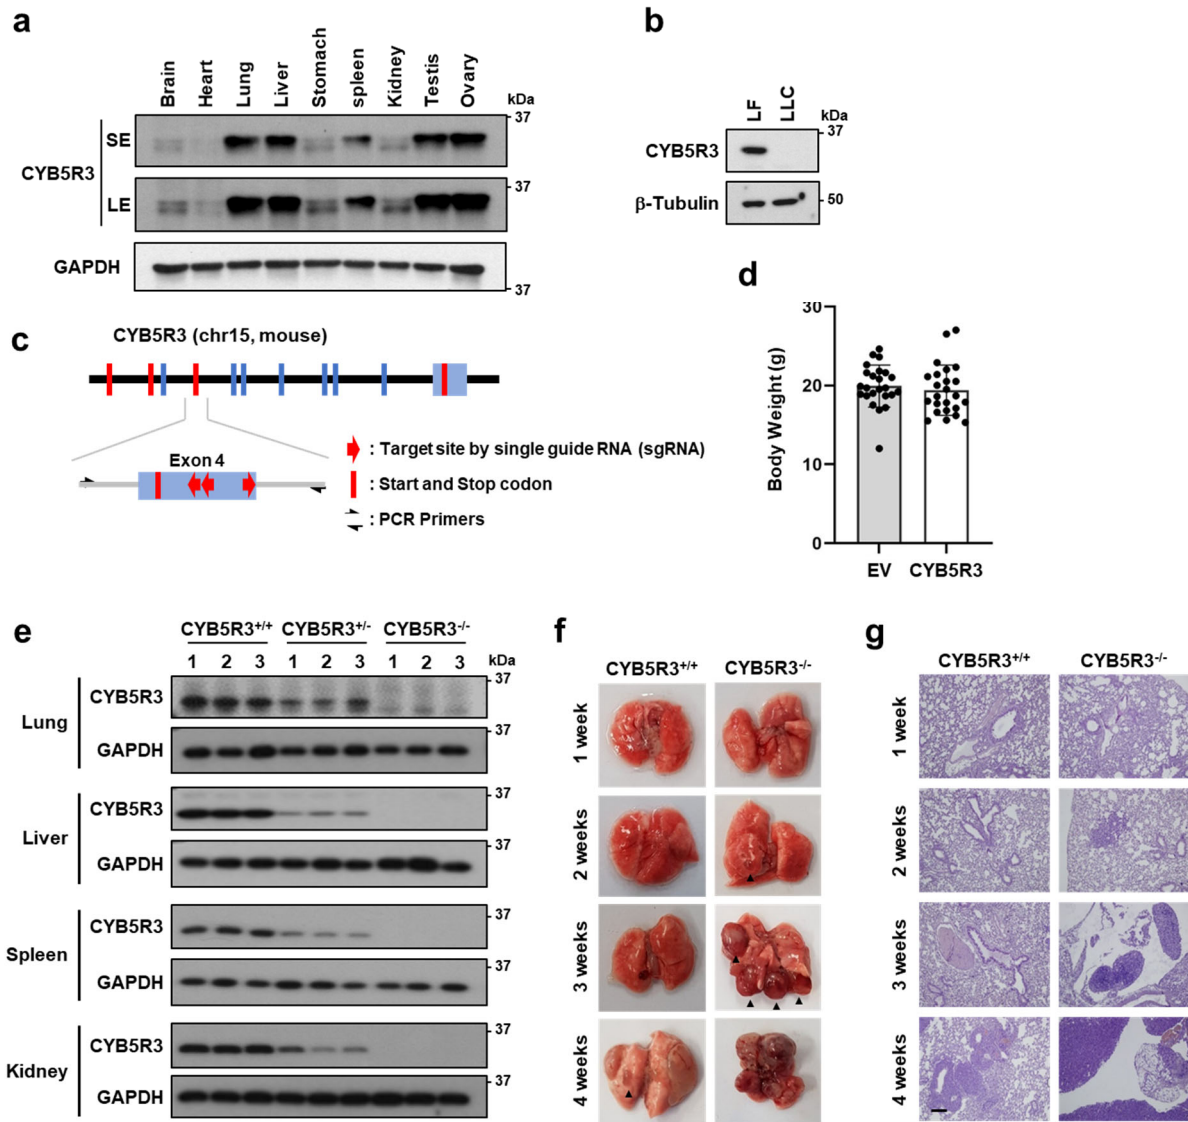

Supplementary Fig. 3

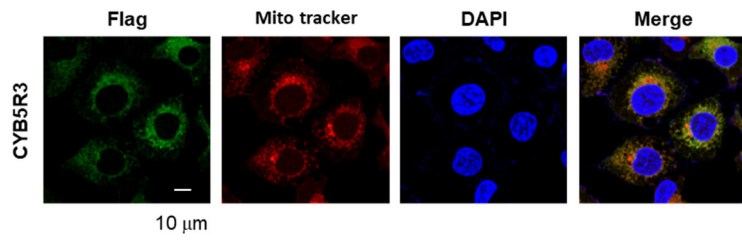

Supplementary Fig. 4



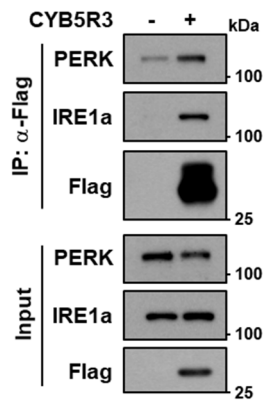

Supplementary Fig. 5

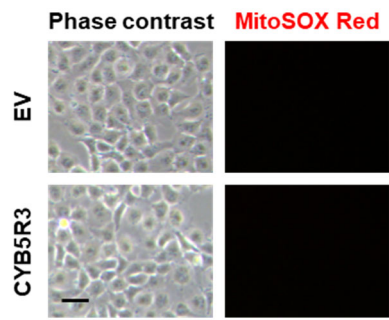

Supplementary Fig. 6

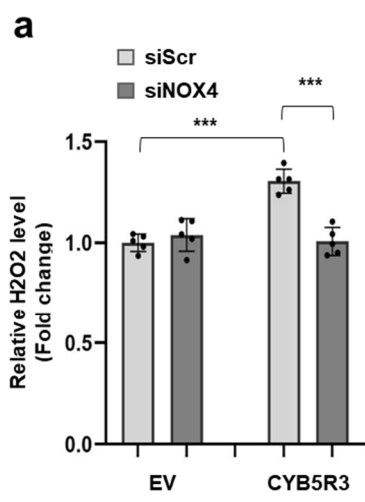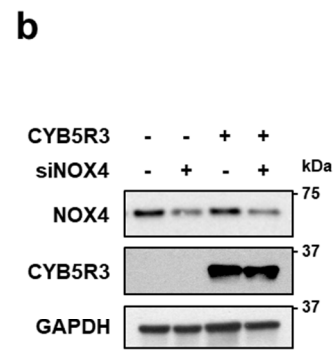

Supplementary Fig. 7

Supplementary Table 1. Hematology of WT and CYB5R3 KO mice

|                                                | WT (n=3) |       |       | CYB5R3 KO (n=3) |       |       | <i>p</i> -value |
|------------------------------------------------|----------|-------|-------|-----------------|-------|-------|-----------------|
|                                                | 1        | 2     | 3     | 1               | 2     | 3     |                 |
| WBC (White blood cell) ( $1 \times 10^3$ / ul) | 6.07     | 7.14  | 7.84  | 5.13            | 3.34  | 3.72  | *0.017          |
| Lymphocytes ( $1 \times 10^3$ / ul)            | 5.37     | 5.02  | 5.84  | 4.56            | 2.95  | 2.77  | *0.032          |
| Monocytes ( $1 \times 10^3$ / ul)              | 0.27     | 0.22  | 0.14  | 0.12            | 0.13  | 0.07  | 0.070           |
| RBC (Red blood cell) ( $1 \times 10^6$ / ul)   | 9.51     | 8.98  | 8.53  | 8.81            | 9.18  | 8.18  | 0.524           |
| Hemoglobin (g/dl)                              | 14.80    | 13.40 | 13.20 | 13.30           | 13.60 | 12.60 | 0.339           |
| Hematocrit (%)                                 | 48.70    | 45.00 | 42.90 | 44.50           | 46.50 | 39.90 | 0.503           |
| Platelet ( $1 \times 10^3$ / ul)               | 509      | 449   | 505   | 1023            | 50    | 238   | 0.874           |

g/dl is grams per deciliter. *P* values are unpaired 2-tailed *t* test. \* indicates  $P < 0.05$  between WT and CYB5R3 KO with unpaired parametric *t*-test

Table 2. Absolute concentration of the intracellular metabolite level in H1299 cells infected with EV (AdEV-24), CVB5R3 (AdR3-24) for 24 h or EV (AdEV-36), CVB5R3 (AdR3-36) for 36 h.

| ID     | Compound name              | Pathway Label              | ubChem Cl | HMDB ID     | AdEV-24 |        |        | AdR3-24 |         |         | AdEV-36 |        |         | AdR3-36 |         |         |
|--------|----------------------------|----------------------------|-----------|-------------|---------|--------|--------|---------|---------|---------|---------|--------|---------|---------|---------|---------|
|        |                            |                            |           |             | 1       | 2      | 3      | 1       | 2       | 3       | 1       | 2      | 3       | 1       | 2       | 3       |
| A_0001 | NAD <sup>+</sup>           | NAD <sup>+</sup>           | 5893      | HMDB0000902 | 3.766   | 3.095  | 3.494  | 4.562   | 4.577   | 4.195   | 3.770   | 3.775  | 3.763   | 5.123   | 4.855   | 5.125   |
| A_0002 | cAMP                       | cAMP                       | 8076      | HMDB0000058 | 3.86    | 230    | 169    | 115     | 109     | 133     | 132     | 42     | 47      | 21      | 22      | 20      |
| A_0003 | cGMP                       | cGMP                       | 24316     | HMDB0001314 | N.D.    | N.D.   | N.D.   | N.D.    | N.D.    | N.D.    | 0.11    | N.D.   | N.D.    | N.D.    | N.D.    |         |
| A_0004 | NADH                       | NADH                       | 439153    | HMDB0001487 | 239     | 218    | 246    | 246     | 234     | 223     | 231     | 220    | 205     | 201     | 176     | 201     |
| A_0005 | Xanthine                   | Xanthine                   | 1188      | HMDB0000292 | 29      | 24     | 25     | 45      | 38      | 38      | 17      | 20     | 20      | 26      | 27      | 25      |
| A_0006 | ADP-ribose                 | ADP-Rib                    | 445794    | HMDB0001178 | 3.8     | 3.9    | 2.6    | 5.2     | 5.5     | 5.4     | 4.5     | 3.8    | 4.7     | 5.2     | 5.6     | 4.6     |
| A_0007 | Mevalonic acid             | Mevalonic acid             | 134965    | HMDB0000227 | N.D.    | N.D.   | N.D.   | N.D.    | N.D.    | N.D.    | N.D.    | N.D.   | N.D.    | N.D.    | N.D.    | N.D.    |
| A_0008 | UDP-glucose                | UDP-Glc                    | 8629      | HMDB0000286 | 3.205   | 2.975  | 3.014  | 3.240   | 3.305   | 2.691   | 5.464   | 5.605  | 5.163   | 7.284   | 6.994   | 7.286   |
| A_0009 | Uric acid                  | Uric acid                  | 1175      | HMDB0000289 | N.D.    | N.D.   | N.D.   | N.D.    | N.D.    | N.D.    | 2.0     | 3.5    | 1.2     | N.D.    | 1.2     | 0.3     |
| A_0010 | NADP <sup>+</sup>          | NADP <sup>+</sup>          | 5886      | HMDB0000217 | 162     | 134    | 136    | 191     | 228     | 158     | 211     | 214    | 200     | 281     | 272     | 254     |
| A_0011 | IMP                        | IMP                        | 8582      | HMDB0000175 | 67      | 53     | 53     | 72      | 74      | 73      | 11      | 11     | 11      | 19      | 18      | 17      |
| A_0012 | Sedoheptulose 7-phosphate  | S7P                        | 165007    | HMDB0001068 | N.D.    | N.D.   | N.D.   | N.D.    | N.D.    | N.D.    | N.D.    | N.D.   | N.D.    | N.D.    | N.D.    | N.D.    |
| A_0013 | Glucose 6-phosphate        | 6GP                        | 5958      | HMDB0001401 | 51      | 42     | 41     | 34      | 32      | 15      | 98      | 113    | 108     | 66      | 63      | 59      |
| A_0014 | Fructose 6-phosphate       | F6P                        | 603       | HMDB0000124 | 5.5     | 6.2    | 5.3    | 6.8     | 2.3     | 4.0     | 16      | 16     | 17      | 7.0     | 7.8     | 7.4     |
| A_0015 | Fructose 1-phosphate       | DF1P                       | 439394    | HMDB0001076 | 93      | 100    | 82     | 80      | 44      | 38      | 168     | 143    | 153     | 158     | 173     | 176     |
| A_0016 | Galactose 1-phosphate      | Gal1P                      | 123912    | HMDB0000364 | 59      | 57     | 54     | 42      | 51      | 25      | 39      | 59     | 58      | 82      | 73      | 83      |
| A_0017 | Glucose 1-phosphate        | G1P                        | 6533      | HMDB0001586 | 24      | 13     | 15     | 34      | 23      | 26      | 51      | 31     | 37      | 30      | 54      | 48      |
| A_0018 | Acetyl-CoA                 | AcCoA                      | 92153     | HMDB0001484 | N.D.    | N.D.   | N.D.   | N.D.    | N.D.    | N.D.    | N.D.    | N.D.   | N.D.    | N.D.    | N.D.    | N.D.    |
| A_0019 | Acetyl CoA                 | AcCoA                      | 444493    | HMDB0001206 | 1.7     | 1.5    | 3.4    | 2.8     | 4.2     | 5.5     | 1.3     | 2.3    | 1.0     | 6.3     | 1.6     | 1.4     |
| A_0020 | Folic acid                 | Folic acid                 | 8037      | HMDB0000121 | 1.4     | 1.5    | 1.6    | 2.3     | 2.3     | 2.3     | 0.9     | 1.0    | 1.0     | 1.5     | 1.4     | 1.3     |
| A_0021 | Ribose 5-phosphate         | R5P                        | 439167    | HMDB0001548 | 63      | 64     | 45     | 69      | 58      | 37      | 40      | 27     | 32      | 20      | 32      | 26      |
| A_0022 | CoA                        | CoA                        | 87642     | HMDB0001423 | 170     | 143    | 156    | 191     | 193     | 178     | 116     | 110    | 92      | 105     | 116     | 117     |
| A_0023 | Ribose 1-phosphate         | R1P                        | 439236    | HMDB0001489 | 32      | 27     | 36     | 29      | 38      | 37      | 58      | 52     | 50      | 34      | 54      | 41      |
| A_0024 | Ribulose 5-phosphate       | Ru5P                       | 439184    | HMDB0000618 | 76      | 54     | 89     | 70      | 64      | 33      | 21      | 17     | 13      | 19      | 23      | 20      |
| A_0025 | Xylulose 5-phosphate       | X5P                        | 439190    | HMDB0000868 | N.D.    | N.D.   | N.D.   | N.D.    | N.D.    | N.D.    | N.D.    | N.D.   | N.D.    | N.D.    | N.D.    | N.D.    |
| A_0026 | Erythrose 4-phosphate      | E4P                        | 122357    | HMDB0001321 | N.D.    | N.D.   | N.D.   | N.D.    | N.D.    | N.D.    | N.D.    | N.D.   | N.D.    | N.D.    | N.D.    | N.D.    |
| A_0027 | HMG CoA                    | HMG-CoA                    | 445127    | HMDB0001375 | 43      | 42     | 48     | 56      | 57      | 53      | 24      | 24     | 20      | 48      | 50      | 50      |
| A_0028 | Glyceraldehyde 3-phosphate | Glyceraldehyde 3-phosphate | 729       | HMDB0001112 | N.D.    | N.D.   | N.D.   | N.D.    | N.D.    | N.D.    | N.D.    | N.D.   | N.D.    | N.D.    | N.D.    | N.D.    |
| A_0029 | NADPH                      | NADPH                      | 5884      | HMDB0000221 | 110     | 112    | 129    | 135     | 112     | 130     | 93      | 95     | 97      | 90      | 91      | 116     |
| A_0030 | Malonyl CoA                | Malonyl-CoA                | 644066    | HMDB0001175 | 6.7     | 6.1    | 7.2    | 8.6     | 9.2     | 8.9     | 4.2     | 4.2    | 2.7     | 6.9     | 6.4     | 5.1     |
| A_0031 | Phosphocreatine            | Phosphocreatine            | 9548602   | HMDB0001511 | 2.379   | 2.148  | 2.394  | 2.202   | 2.240   | 1.941   | 3.604   | 3.416  | 3.452   | 3.826   | 3.858   | 3.780   |
| A_0032 | XMP                        | XMP                        | 73323     | HMDB0001554 | 9.3     | 6.6    | 7.6    | 8.7     | 9.1     | 8.2     | 11      | 4.9    | 13      | 6.5     | 6.3     | 5.6     |
| A_0033 | Dihydroxyacetone phosphate | DHAP                       | 668       | HMDB0001473 | 35      | N.D.   | N.D.   | N.D.    | N.D.    | N.D.    | 216     | 141    | 109     | 45      | 38      | 35      |
| A_0034 | Adenylosuccinic acid       | Succinyl AMP               | 447145    | HMDB0000536 | 74      | 79     | 77     | 120     | 117     | 113     | 4.2     | 3.6    | 4.7     | 6.2     | 6.5     | 6.2     |
| A_0035 | Fructose 1,6-diphosphate   | F1,6P                      | 172313    | HMDB0001058 | 1.369   | 996    | 1.232  | 684     | 839     | 424     | 3.354   | 3.325  | 3.170   | 2.272   | 2.624   | 2.379   |
| A_0036 | 6-Phosphogluconic acid     | 6-PG                       | 91493     | HMDB0001316 | 37      | 26     | 25     | 38      | 34      | 34      | 28      | 32     | 32      | 36      | 32      | 32      |
| A_0037 | N-Carbamoylaspartic acid   | Carbamoyl-Asp              | 93072     | HMDB0000828 | 172     | 162    | 169    | 219     | 223     | 231     | 42      | 39     | 42      | 48      | 42      | 43      |
| A_0038 | PRPP                       | PRPP                       | 7339      | HMDB0000280 | 4,333   | 3,048  | 4,474  | 3,523   | 4,008   | 2,580   | 3,789   | 3,309  | 3,728   | 3,274   | 3,602   | 3,283   |
| A_0039 | 2-Phosphoglyceric acid     | 2-PG                       | 439278    | HMDB0003391 | 39      | 40     | 65     | 54      | 46      | 52      | 26      | 25     | 27      | 34      | 44      | 38      |
| A_0040 | 2,3-Diphosphoglyceric acid | Diphosphoglycerate         | 186004    | HMDB0001294 | 68      | 67     | 82     | 47      | 44      | 43      | 60      | 58     | 66      | 73      | 64      | 74      |
| A_0041 | 3-Phosphoglyceric acid     | 3-PG                       | 439183    | HMDB0000807 | 363     | 354    | 554    | 473     | 373     | 419     | 232     | 202    | 264     | 308     | 386     | 355     |
| A_0042 | Phosphoenolpyruvic acid    | PEP                        | 1005      | HMDB0000263 | 134     | 147    | 212    | 168     | 149     | 159     | 82      | 81     | 92      | 100     | 120     | 115     |
| A_0043 | GMP                        | GMP                        | 6804      | HMDB0001397 | 43      | 52     | 35     | 168     | 160     | 169     | 20      | 22     | 17      | 49      | 54      | 44      |
| A_0044 | AMP                        | AMP                        | 6083      | HMDB0000345 | 222     | 332    | 260    | 1,207   | 1,154   | 1,262   | 80      | 65     | 53      | 148     | 144     | 103     |
| A_0045 | 2-Oxoisovaleric acid       | 2-KIV                      | 49        | HMDB0000019 | 69      | 68     | 67     | 105     | 110     | 101     | 46      | 48     | 48      | 64      | 72      | 63      |
| A_0046 | GDP                        | GDP                        | 8977      | HMDB0001291 | 201     | 300    | 256    | 723     | 736     | 802     | 119     | 123    | 112     | 209     | 227     | 182     |
| A_0047 | Lactic acid                | Lactic acid                | 612       | HMDB0001160 | 87,728  | 83,633 | 82,696 | 131,003 | 133,314 | 127,054 | 54,481  | 54,374 | 55,274  | 81,561  | 82,326  | 80,723  |
| A_0048 | ADP                        | ADP                        | 8932      | HMDB0001341 | 1,165   | 1,543  | 1,369  | 3,996   | 3,679   | 4,582   | 565     | 506    | 455     | 1,005   | 1,026   | 843     |
| A_0049 | GTP                        | GTP                        | 6850      | HMDB0001273 | 4,500   | 4,294  | 3,886  | 4,754   | 4,924   | 4,372   | 5,584   | 5,785  | 5,492   | 7,151   | 7,176   | 7,080   |
| A_0050 | Glyoxylic acid             | Glyoxylic acid             | 760       | HMDB0000119 | N.D.    | N.D.   | N.D.   | N.D.    | N.D.    | N.D.    | N.D.    | N.D.   | N.D.    | N.D.    | N.D.    | N.D.    |
| A_0051 | ATP                        | ATP                        | 5957      | HMDB0000538 | 17,359  | 16,116 | 15,571 | 19,731  | 19,686  | 18,955  | 18,048  | 18,843 | 18,047  | 23,418  | 22,795  | 22,890  |
| A_0052 | Glycerol 3-phosphate       | Glycerol 3-phosphate       | 439162    | HMDB0000126 | 199     | 216    | 237    | 302     | 335     | 320     | 277     | 279    | 274     | 304     | 317     | 255     |
| A_0053 | Glycolic acid              | Glycolic acid              | 757       | HMDB0000115 | N.D.    | N.D.   | N.D.   | N.D.    | N.D.    | N.D.    | N.D.    | N.D.   | N.D.    | N.D.    | N.D.    | N.D.    |
| A_0054 | Pyruvic acid               | Pyruvic acid               | 1060      | HMDB0000243 | 418     | 398    | 361    | 353     | 502     | 478     | 176     | 159    | 171     | 263     | 212     | 153     |
| A_0055 | N-Acetylglycolic acid      | N-AcGly                    | 70914     | HMDB0001138 | 190     | 187    | 192    | 252     | 237     | 196     | 145     | 146    | 149     | 171     | 176     | 161     |
| A_0056 | 2-Hydroxyglutaric acid     | 2-Hydroxyglutaric acid     | 43        | HMDB0000606 | 93      | 97     | 88     | 133     | 141     | 158     | 65      | 63     | 53      | 97      | 93      | 84      |
| A_0057 | Carbamoylphosphate         | Carbamoyl-P                | 278       | HMDB0001096 | N.D.    | N.D.   | N.D.   | N.D.    | N.D.    | N.D.    | N.D.    | N.D.   | N.D.    | N.D.    | N.D.    | N.D.    |
| A_0058 | Succinic acid              | Succinic acid              | 1110      | HMDB0000254 | 618     | 613    | 565    | 2,715   | 2,655   | 2,569   | 113     | 120    | 150     | 407     | 410     | 360     |
| A_0059 | Malic acid                 | Malic acid                 | 525       | HMDB0000156 | 6,657   | 6,145  | 6,196  | 11,225  | 10,825  | 10,799  | 1,945   | 1,681  | 1,803   | 2,289   | 2,025   | 2,136   |
| A_0060 | 2-Oxoglutaric acid         | 2-OG                       | 51        | HMDB0000208 | 967     | 991    | 824    | 682     | 586     | 720     | 225     | 164    | 8       | 195     | 177     | 120     |
| A_0061 | Fumaric acid               | Fumaric acid               | 444972    | HMDB0001334 | 1,078   | 1,147  | 1,083  | 2,018   | 1,903   | 1,911   | 276     | 218    | 258     | 260     | 249     | 244     |
| A_0062 | Citric acid                | Citric acid                | 311       | HMDB0000094 | 10,207  | 8,996  | 9,952  | 10,096  | 10,484  | 9,215   | 6,300   | 6,821  | 6,728   | 6,325   | 6,176   | 6,005   |
| A_0063 | cis-Aconitic acid          | cis-Aconitic acid          | 643757    | HMDB0000072 | 176     | 168    | 190    | 163     | 173     | 145     | 120     | 121    | 122     | 97      | 89      | 83      |
| A_0064 | Isoitic acid               | Isoitic acid               | 1198      | HMDB0000193 | 378     | 336    | 332    | 361     | 347     | 308     | 217     | 231    | 248     | 153     | 132     | 126     |
| C_0001 | Urea                       | Urea                       | 1176      | HMDB0000294 | 4,478   | 3,992  | 4,704  | 6,307   | 6,150   | 5,486   | 4,044   | 4,159  | 4,363   | 5,326   | 5,964   | 5,720   |
| C_0002 | Gly                        | Gly                        | 750       | HMDB0000123 | 21,359  | 19,353 | 20,550 | 32,819  | 34,344  | 32,175  | 30,445  | 30,538 | 30,745  | 39,110  | 42,541  | 40,727  |
| C_0003 | Putrescine                 | Putrescine                 | 1045      | HMDB0001414 | 395     | 351    | 384    | 610     | 634     | 569     | 337     | 355    | 341     | 392     | 447     | 462     |
| C_0004 | Ala                        | Ala                        | 602       | HMDB0000161 | 38,964  | 35,911 | 38,766 | 52,148  | 56,326  | 42,819  | 97,734  | 97,646 | 100,871 | 103,759 | 105,047 | 108,151 |
| C_0005 | β-Ala                      | β-Ala                      | 239       | HMDB0000056 | 3,655   | 3,548  | 3,739  | 3,955   | 4,012   | 3,584   | 4,064   | 4,014  | 4,171   | 4,313   | 4,237   | 4,623   |
| C_0006 | Sarcosine                  | Sarcosine                  | 1088      | HMDB0000271 | 176     | 122    | 147    | 227     | 170     | 219     | 236     | 255    | 396     | 297     | 307     | 337     |
| C_0007 | N,N-Dimethylglycine        | DMG                        | 673       | HMDB0000092 | N.D.    | 49     | 50     | 80      |         |         |         |        |         |         |         |         |
